# Supplementary material
Source: ML conference proceedings conference paper supplement (https://openaccess.thecvf.com/content/CVPR2025/html/Peng_Generalized_Gaussian_Entropy_CVPR_2025_paper.html)
Supplement: Supplementary file 1 [file rate-distortion data.xlsx]

## Sheet: Sheet1
Andrew	sparsepcac			tsc-pcsc			spac				sparsepcac with our method			tsc-pcsc with our method			spac with our method
	0.0883562	30.6531		0.0739726	32.351		0.066457	32.6454			0.0730627	30.7174		0.0682101	32.4093		0.0641974	32.6813
	,0.158219178	,32.87346939		,0.123287671	,33.82040816		,0.1111931504749	,33.915105302848			, 0.1479829451338	, 33.014825308377		,0.11243835595200001	,33.840700404896		,0.10756825376941827	, 33.92188832390857
	,0.32260274	,35.2244898		,0.234246575	,35.35510204		,0.21100931476	,35.517735509383996			, 0.315148561886	, 35.50276326942		,0.21721684899750002	,35.404599182856		,0.20100747324037602	, 35.581667433300886
	,0.417123288	,35.87755102		,0.304109589	,35.77959184		,0.2738810958534	,35.736656329792005			, 0.37506630165759996	, 35.942130611836		,0.2777432876337	,35.843995105312004		,0.26309018067677603	, 35.94022999542498
	,0.509589041	,36.26938776		,0.380136986	,36.00816327		,0.3412489723322	,35.961352657748996			, 0.4570115067652	, 36.217573882496		,0.3468369860264	,36.098183678175		,0.32947588278673906	, 36.122929469343645
	bpp	yuv-psnr
David
	0.0991254	31.7904		0.0781341	33.1004		0.0704457	33.0541			0.0870915	31.9017		0.0714693	33.1368		0.0674025	33.1202
	,0.158600583	,33.75545852		,0.12361516	,34.84716157		,0.11098169064800001	,35.136393011031			, 0.1407262972959	,33.870227078968		,0.11357760900800001	,34.913371176983		,0.10577664935660881	,35.16801576474092
	,0.293877551	,36.33187773		,0.235568513	,36.81222707		,0.2116347520792	,37.025737987005996			, 0.2800228571248	,36.535336245288		,0.21552163254370002	,36.900576414968		,0.2040582279547646	,37.0442508559995
	,0.4	,37.33624454		,0.317201166	,37.51091703		,0.28538588905019996	,37.619611353147			, 0.39400000000000004	,37.549061133878006		,0.29077830887219996	,37.529672488515		,0.27280037134308616	,37.653469003364826
	,0.513119534	,38.0349345		,0.411661808	,38.0349345		,0.3705779595616	,38.18976856115			, 0.4955475222852	,38.16805677075		,0.3782760353712	,38.0501484738		,0.3580894823243741	,38.23941526027949
longdress
	0.175953	27.7161		0.178886	29.245		0.160711	29.3591			0.164029	27.9572		0.164324	29.2714		0.153816	29.3826
	,0.325513196480938	,29.9258129683936		,0.27565982404692	,30.777023576		,0.2484246334310843	,30.7592264367			, 0.3139451612903222	, 30.225071098077535		,0.25388269794721335	,30.820547823546		,0.23741942217008727	,30.832773010100976
	,0.624633431085044	,32.1053372434017		,0.478005865102639	,32.135679374389		,0.42929706744868007	,32.10354369501461			, 0.5723008797653959	, 32.1053372434017		,0.4379967741935481	,32.16138791788851		,0.41525905334310825	,32.135647238709616
	,0.797653958944281	,32.7514890843923		,0.595307917888563	,32.6376278918214		,0.5373844574780058	,32.75603382209185			, 0.7209782991202342	, 32.74625248615182		,0.5457782991202346	,32.65721046855649		,0.5170713249853371	,32.821545889736036
	,0.958944281524926	,33.0416682958618		,0.712609970674487	,32.8195764092538		,0.6405651026392963	,33.03228714760505			, 0.8616653958944276	, 33.05497246269138		,0.6555299120234604	,32.88193360443138		,0.6176328719648095	,33.12851003575598
loot
	0.0724768	32.1639		0.0544847	33.7623		0.0489436	33.8805			0.0639028	32.1704		0.0497718	33.8636		0.0466139	33.9347
	,0.113544341299624	,34.2295081967213		,0.0937413588781354	,35.7540983606557		,0.08432035231088278	,35.78985245901635			, 0.10994172921192904	,34.554688524590155		,0.08661701560339712	,35.8577852459016		,0.08083792176044333	,35.836379267213076
	,0.232390628086114	,37.6475409836065		,0.184849644479557	,38.6311475409836		,0.1659949807426422	,38.56547459016392			, 0.218479793353742	,37.92613278688519		,0.17093046625024635	,38.71999918032786		,0.15822641564388656	,38.64260553934425
	,0.324029725459213	,39.0983606557377		,0.25237754295872	,39.7868852459016		,0.22668550908552232	,40.001734426229476			, 0.299150650553031	,39.434606557377045		,0.23405493333991692	,39.818714754098316		,0.21931823004024284	,40.0417361606557
	,0.415647837250641	,40.1311475409836		,0.327719484495358	,40.5983606557377		,0.29412823733458376	,40.472505737704914			, 0.3971930801896101	,40.375947540983596		,0.3001255039008488	,40.62271967213114		,0.28268664890226847	,40.55345074918032
phil
	0.0880597	30.6306		0.080597	32.3134		0.072771	32.2811			0.077607	30.6919		0.0743104	32.3166		0.0696346	32.3037
	,0.150746268656716	,32.9143330964226		,0.129850746268656	,34.184837716181		,0.11685268656716354	,34.52668609334281			, 0.13743059701492502	,32.99332749585402		,0.12031970149253665	,34.26346284292821		,0.11248239608955161	,34.578476122482826
	,0.304477611940298	,35.6078654347311		,0.234328358208955	,35.9275527126273		,0.2115282089552237	,36.19341660270075			, 0.2798794029850742	,35.69688509831793		,0.21640223880596995	,36.01377883913761		,0.2015017718507461	,36.19703594436102
	,0.408955223880597	,36.5886756692726		,0.310447761194029	,36.4648187633262		,0.28021014925373056	,36.37155522388057			, 0.37077641791044773	,36.66917075574499		,0.2834077611940291	,36.4648187633262		,0.26964622662686494	,36.437024023283556
	,0.511940298507462	,37.0933428097607		,0.391044776119403	,36.7162283819		,0.35244865671641795	,36.52163237147593			, 0.45961328358208896	,37.1081801468846		,0.3578059701492538	,36.774974347311044		,0.33958428074626873	,36.572762656796
redandblack
	0.137615	31.7705		0.131062	33.1957		0.117955	32.95			0.125743	32.0564		0.12059	33.2222		0.112329	33.0159
	,0.231979030144167	,33.9181520314547		,0.208387942332896	,34.89374180865		,0.18769501965923946	,34.98795491153335			, 0.21386317169069396	, 34.01651467234592		,0.1921753604193967	,34.92514617627778		,0.1791924352686759	, 35.057930821356415
	,0.423328964613368	,35.913368283093		,0.334207077326343	,36.1155963302752		,0.300853211009174	,36.30973743119263			, 0.3896085190039316	, 35.920550956749615		,0.3065013106159892	,36.15532348623851		,0.29059411651376116	, 36.398465221137584
	,0.546526867627785	,36.5852883355176		,0.416775884665792	,36.5135321100917		,0.37447313237221413	,36.61912683486234			, 0.507937745740498	, 36.713336844691916		,0.3857260812581905	,36.55004564220179		,0.35653586933158504	, 36.742665088532065
	,0.664482306684141	,36.9823394495412		,0.505897771952817	,36.8363040629095		,0.4558138925294882	,36.85472221494095			, 0.6285319790301436	, 37.08574231651368		,0.4680566186107463	,36.85840584534724		,0.4400427318479679	, 36.87683504826991
ricardo
	0.143417	32.7074		0.0963585	33.1878		0.0867131	32.9123			0.125705	32.8579		0.0891895	33.2707		0.0830364	33.0321
	,0.212885154061624	,34.4104803493449		,0.161344537815126	,35.1528384279476		,0.14538756302521005	,35.075502183406115			, 0.1971686274509798	, 34.67198348199926		,0.14769478991596635	,35.216113537117906		,0.14045892463865542	, 35.21408523580786
	,0.386554621848739	,37.117903930131		,0.292436974789915	,37.6419213973799		,0.2634857142857134	,37.736026200873354			, 0.3681831932773105	, 37.31855895196506		,0.2684863865546209	,37.64944978165938		,0.2538157885714277	, 37.76621502183405
	,0.506442577030812	,38.296943231441		,0.377591036414565	,38.4279475982532		,0.340700392156862	,38.22043668122263			, 0.4821003921568624	, 38.43395633187768		,0.3494605042016799	,38.458689956331796		,0.3277878472941169	, 38.29687755458507
	,0.626330532212885	,38.9956331877729		,0.476190476190476	,38.9956331877729		,0.42980952380952364	,38.69979912663753			, 0.5878513165266106	, 39.06972489082967		,0.43771428571428556	,39.05802620087334		,0.41167156190476173	, 38.726888986026175
sarah
	0.0529016	35.6667		0.0313973	37.3704		0.0282796	37.2358			0.0463312	35.713		0.0288007	37.4376		0.0270437	37.3358
	,0.0768270944741532	,37.7404834235		,0.0453282828282828	,38.92357876		,0.04093143939393937	,38.947375913572			, 0.06856174688057032	, 37.835097023634		,0.04194226010101008	,39.0642666666666		,0.039556143030303005	, 39.07464094342216
	,0.143518518518518	,40.0376578453		,0.0846628045157456	,40.5181533547856		,0.07598486705288167	,40.33602946322195			, 0.1372291666666662	, 40.12913468242		,0.07758499405822926	,40.52742460125		,0.07324941183897793	, 40.50055985768976
	,0.184907902554961	,40.8552769693		,0.115369380075262	,41.14811745290215		,0.10414393939393901	,41.17369581409955			, 0.18223819370172277	, 41.10458135		,0.10532070707070669	,41.2779834681		,0.1004051719696966	, 41.281934739672995
	,0.232343038225391	,41.235778346		,0.155456526044761	,41.4435345468		,0.139522232125173	,41.3469745108885			, 0.22506596553773013	, 41.3793454668		,0.14426365616953823	,41.4901495736		,0.13440176620617916	, 41.42968286789343
soldier
	0.0984211	29.7824		0.0850837	31.2468		0.0764137	31.1031			0.0869156	30.0742		0.0782855	31.3405		0.0731432	31.1404
	,0.179670598	,31.88749983		,0.152823926	,33.28770498		,0.1373275799036	,33.377581783446			, 0.1589366109908	, 32.129844828708		,0.1411787428388	,33.301020061992		,0.1312165025978898	, 33.444336947012886
	,0.362308233	,35.07948381		,0.309507151	,35.80986594		,0.27837073160939996	,35.942897693242006			, 0.33669362646529997	, 35.237341487144995		,0.2868512275468	,35.888647645068		,0.2653986555164019	, 35.9850691704739
	,0.494108478	,36.45415739		,0.414252888	,36.73760263		,0.3717505416912	,36.671474945266			, 0.4763966077696	, 36.8186989639		,0.3778814844336	,36.752297671052		,0.3566202946443682	, 36.733816452672954
	,0.622479429	,37.35098744		,0.518962791	,37.34686656		,0.4660804825971	,37.010356233152			, 0.5862879468904001	, 37.402086721936		,0.4744357835322	,37.455172473024		,0.44589919770064557	, 37.232562446891895
